# Supplementary material
Source: PubMed Central journal article supplement (PMC3137103)
Supplement: supp_M111.222745_jbc.M111.222745-1.pdf [file supp_M111.222745_jbc.M111.222745-1.pdf]

**CHARACTERIZATION OF A DIPARTITE IRON-UPTAKE SYSTEM  
FROM UROPATHOGENIC *Escherichia coli* STRAIN F11**

Doreen Koch<sup>1</sup>, Anson C. K. Chan<sup>2</sup>, Michael E. P. Murphy<sup>2</sup>, Hauke Lilie<sup>3</sup>, Gregor Grass<sup>4\*</sup> and Dietrich H. Nies<sup>1</sup>

<sup>1</sup>Molecular Microbiology, Martin-Luther-University Halle-Wittenberg, Kurt-Mothes-Str. 3, 06120 Halle/Saale, Germany, European Community.

<sup>2</sup>Dept. of Microbiology and Immunology, Life Sciences Institute, University of British Columbia, 2350 Health Sciences Mall, Vancouver, BC V6T 1Z3, Canada.

<sup>3</sup>Institute for Biochemistry and Biotechnology, Martin-Luther-University Halle-Wittenberg, Kurt-Mothes-Str. 3, 06120 Halle/Saale, Germany.

<sup>4</sup>School of Biological Sciences, E141 Beadle Center, University of Nebraska-Lincoln, Lincoln, NE 68588, USA.

<sup>5</sup>Bundeswehr Institute of Microbiology, Neuherbergstr. 11, 80937 Munich, Germany.

## Supplemental Material

### TABLES

**Table S1. Primers used in this study.**

| Primer                            | Sequence                                                      |
|-----------------------------------|---------------------------------------------------------------|
| <i>fetMP</i> <sub>prom</sub> d    | TTACAGCGTCTTGCCAGCGATC                                        |
| <i>fetMP</i> <sub>prom</sub> u    | AAGAGTTACGGAAGTTACGCACGT                                      |
| pGEM <i>fetMP</i> u               | GTACGGCGGGTTGAATTAAGCG                                        |
| pGEM <i>fetM</i> u                | GTATCCTCTCGTCTAAAACAACGGCT                                    |
| pGEM Delta <i>fetM NcoI</i> d     | AAACCATGGAACCCATAATCGTTGTATAGCCGT                             |
| pGEM Delta <i>fetM NcoI</i> u     | AAACCATGGTTCGCTGTTTTATCAAGACGTTG                              |
| pUC18 <i>lacZ KpnI</i> d          | TTTGGTACCCAGGAAACAGCTATGACCATGATT                             |
| pUC18 <i>lacZ KpnI</i> u          | ACGGGTACCCATGGCCTGCCCGGTTATTAT                                |
| <i>fetP</i> T7 new d              | GAAATTAATACGACTCACTATAGGGAACCTGCAACCGATTGATATGG               |
| <i>fetP</i> u                     | GGCGCGTTGGTTAGTCGGTT                                          |
| <i>fetP</i> helper probe1 (H1)    | TTCAATGTGGTAGGTCACITTA                                        |
| <i>fetP</i> helper probe2 (H2)    | CCATCGCTGGCAACCATCG                                           |
| <i>fetP</i> capture probe (BIO)   | Biotin-AGTTGCCACGCCCATCATT                                    |
| <i>fetP</i> detection probe (DIG) | TGATGTTTCGCGCCATAGTGC                                         |
| pASK3 <i>fetM EcoRI</i> d         | GGCGAATTCACGTCGTAACCTCCGTAACCTCTTT                            |
| pASK3 <i>fetM PstI</i> u          | AAACTGCGAGTGGGTTATTTTTATCGTCTCCCCGGGA                         |
| pASK3 <i>fetP EcoRI</i> d         | AGCGAATTCACCATGAAGAAAACCCTGATTGCC                             |
| pASK3 <i>fetP PstI</i> u          | TCGCTGCGAGTTTCAGACCGACATATTTAAACTCGTAGCTC                     |
| pET22b(+) <i>fetP NcoI</i> d      | AAACCATGGGCTTTAAAGAGTACCCGGCAGGC                              |
| pET22b(+) <i>fetP XhoI</i> u      | AAACTCGAGGCTGCCGCGCGGCACCAGGCCGCTGCTGTTTCAGACCGACATATTTAAACTC |

**Table S2. FetP is a dimeric protein<sup>a</sup>**

| Addition                      | $s_{app}$ (S) | $M_{r,app}$ (Da) |
|-------------------------------|---------------|------------------|
| none                          | 2.7           | 35,000           |
| 100 mM NaCl                   | 2.8           | 35,400           |
| 20 mM NaCl                    | 2.8           | 34,800           |
| 300 $\mu$ M FeCl <sub>3</sub> | 2.7           | 34,500           |
| 300 $\mu$ M ZnCl <sub>2</sub> | 2.7           | 34,600           |
| 300 $\mu$ M CuCl <sub>2</sub> | 2.8           | 37,000           |

<sup>a</sup>Periplasmic FetP without any tag was incubated for 30 min with 10 mM EDTA and dialyzed against 25 mM Tris/HCl, pH 7.2 in ultrapure water. Analytical ultracentrifugation was performed with 17  $\mu$ M FetP in 300  $\mu$ l sample in the absence or presence of the indicated metal salts.

**SUPPLEMENTARY FIGURES**

Figure S1

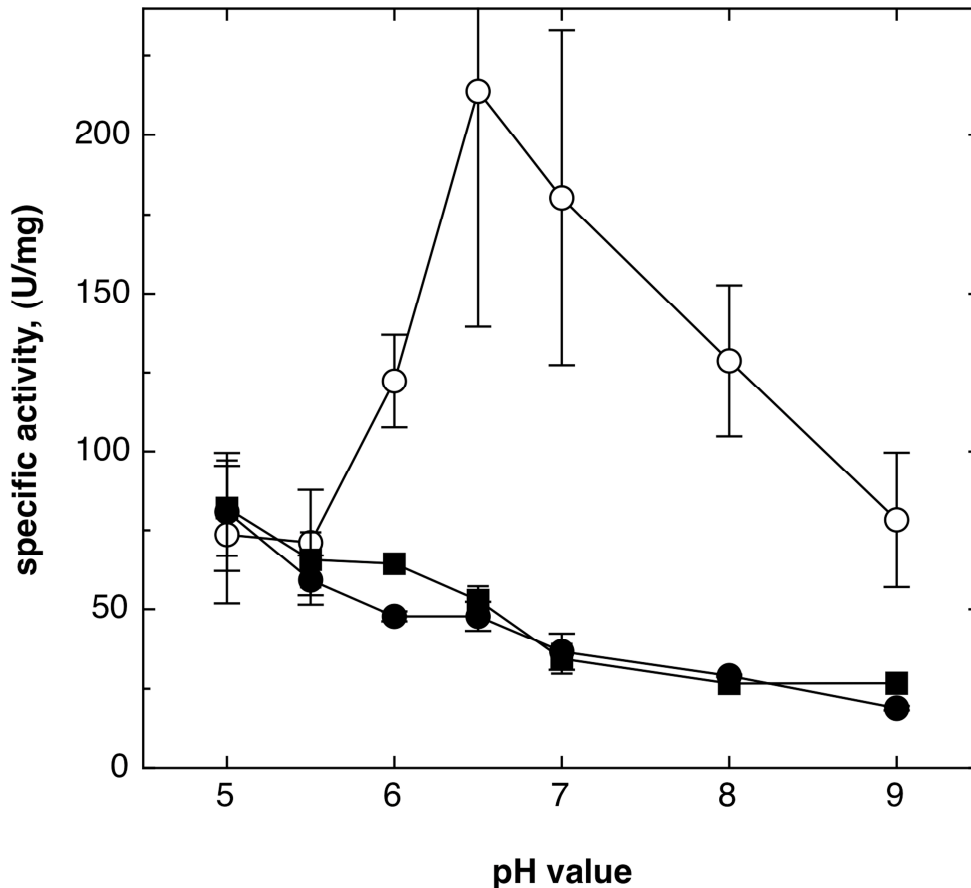

**Figure S1. Expression of *fetMp-lacZ* in the natural host *E. coli* strain F11.** A *fetMp-lacZ* reporter gene fusion was inserted single copy into the chromosome of the uropathogenic wild type strain F11. The cells were incubated in the presence of 50  $\mu$ M DIP (open circles,  $\circ$ ), Fe(III)Cl<sub>3</sub> (closed circles,  $\bullet$ ) or Fe(II)SO<sub>4</sub> (closed squares,  $\blacksquare$ ) and specific  $\beta$ -galactosidase activity was determined. DIP, four experiments, each iron species two experiments, deviation bars shown.

Figure S2

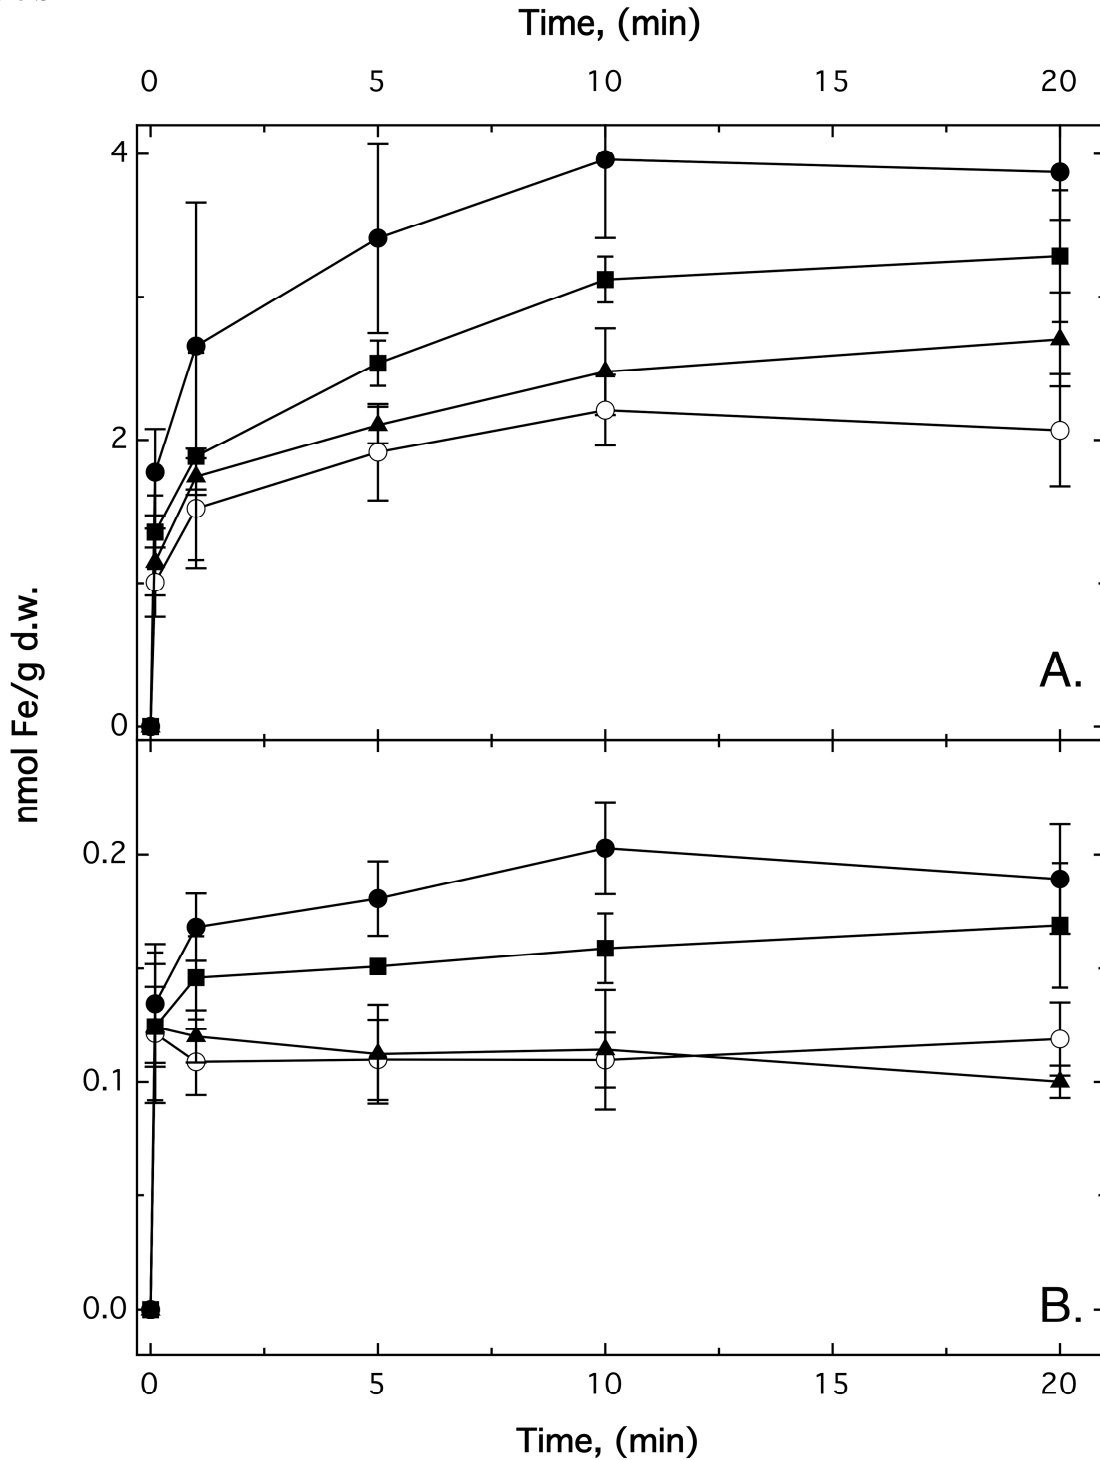

**Figure S2. Iron uptake at pH 9 and 5.** Uptake of  $^{55}\text{Fe}$  by cells of strain ECA611 (*glmS-Gm*) (○), ECA612 (*glmS-fetMP*) (●), ECA613 (*glmS-fetM*) (■) and ECA614 (*glmS-fetP*) (▲) using the filtration method at pH 9 (panel A) and pH 5 (panel B). For the uptake experiment to cells were added  $^{55}\text{Fe(II)Cl}_3$  at a final  $1 \mu\text{Ci}$ ,  $1 \text{ mM}$  ascorbate,  $5 \mu\text{M}$   $\text{FeSO}_4$ , and samples were removed at indicated time points. Averages of three independent experiments with standard deviations (error bars) are shown.

Figure S3

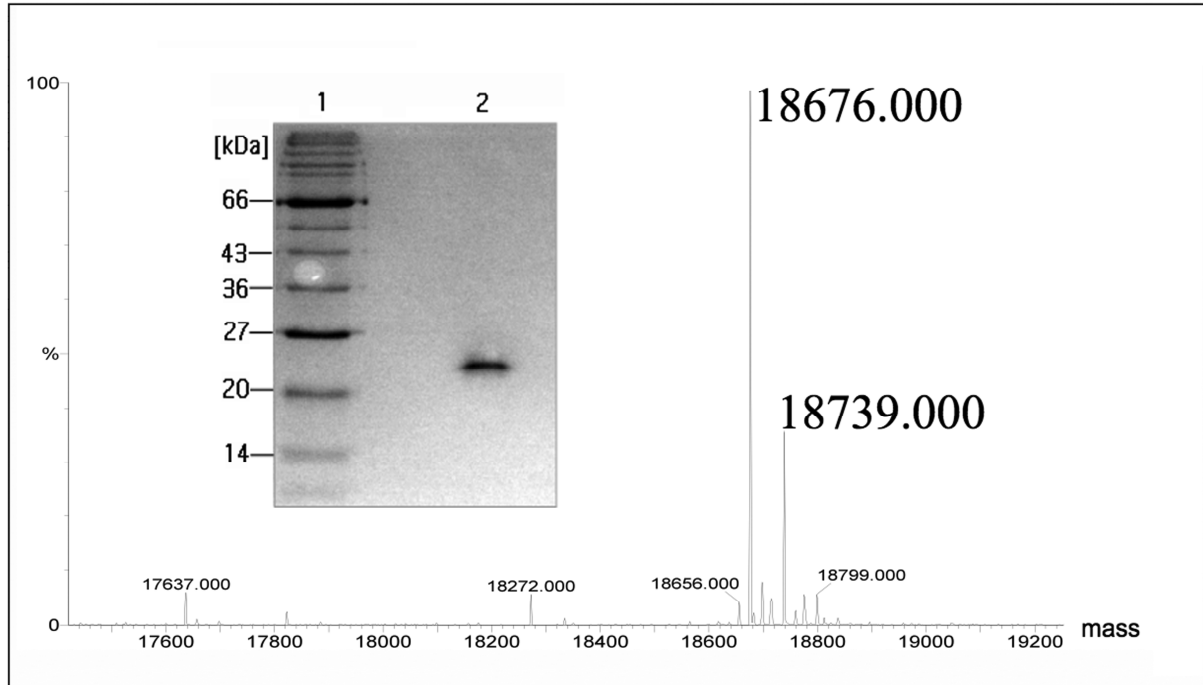

**Figure S3. Purification of Strep-tagged FetP.** MALDI-TOF analysis of the purified FetP protein yielding two size peaks of 18.676 and of 18.739 kDa. Inset: Coomassie-stained SDS PAGE of FetP after Strep-tactin affinity chromatography. The gel was loaded with 4  $\mu$ g protein in lane 2 and a marker in lane 1 with sizes indicated on the left.

Figure S4

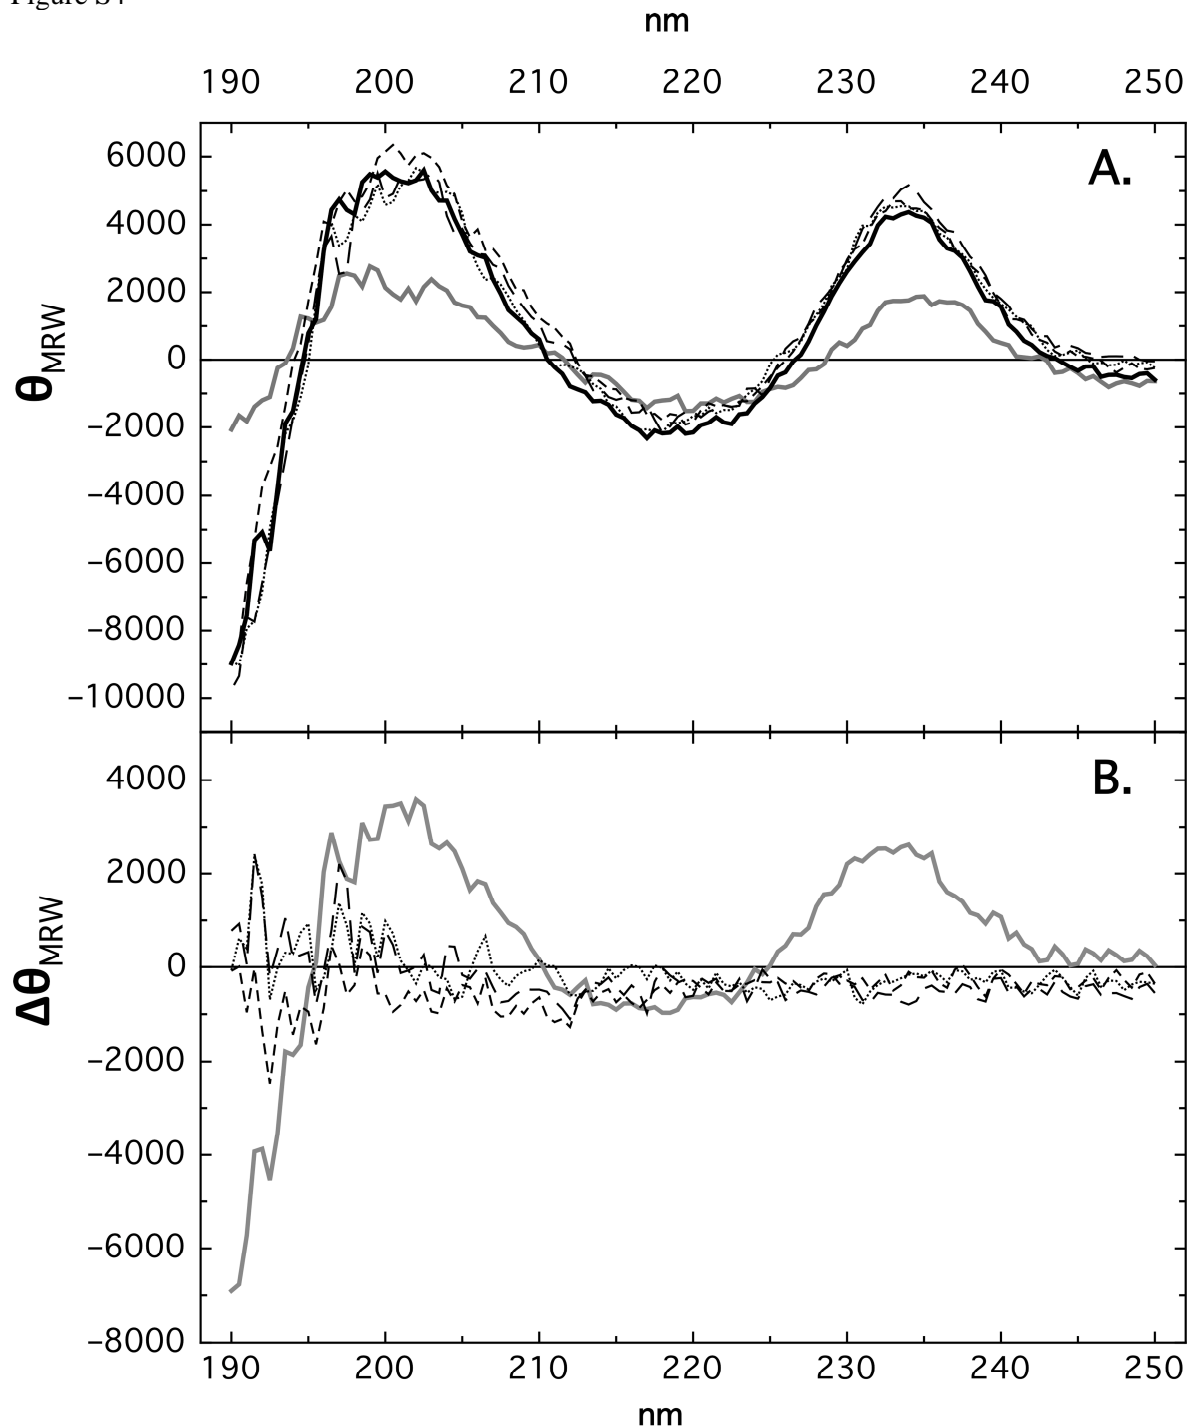

**Figure S4. CD spectrum of FetP.** (A) circular dichroism spectrum ( $\theta_{MRW}$ ) of FetP (51  $\mu$ M) is shown in the absence of metals (thick solid black line), and in the presence of 150  $\mu$ M  $ZnCl_2$  (dotted black line), 100  $\mu$ M  $MnCl_2$  (short-distance dashed black line), 100  $\mu$ M  $FeSO_4$ /1 mM ascorbate (long-distanced dashed black line) or 100  $\mu$ M  $CuCl_2$  (thick grey line). (B) The difference spectrum ( $\Delta\theta_{MRW}$ , none minus respective metal) in 25 mM Tris/HCl buffer (pH 7.2), 25°C.

Figure S5a

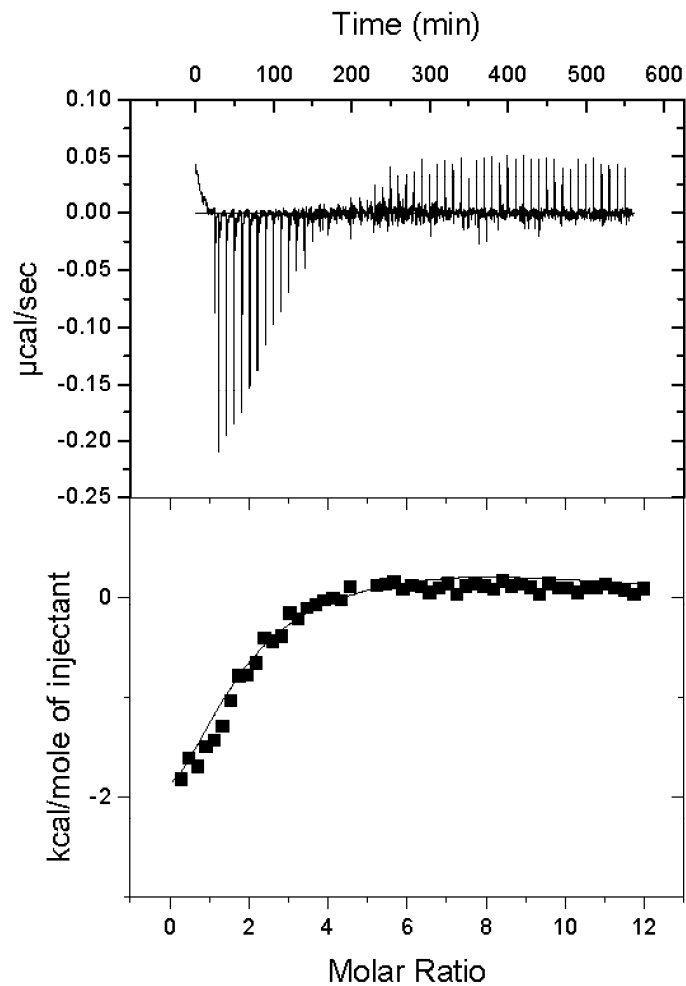

**Figure S5a. Isothermal calorimetric assay of FetP titrated with copper in Bis-Tris buffer.** A representative titration curve is shown. Top: Baseline-subtracted raw data. Bottom: Peak-integrated and concentration-normalized enthalpy changes vs. Cu(II)/FetP ratios. FetP protomer concentration was used for analysis.

Figure S5b

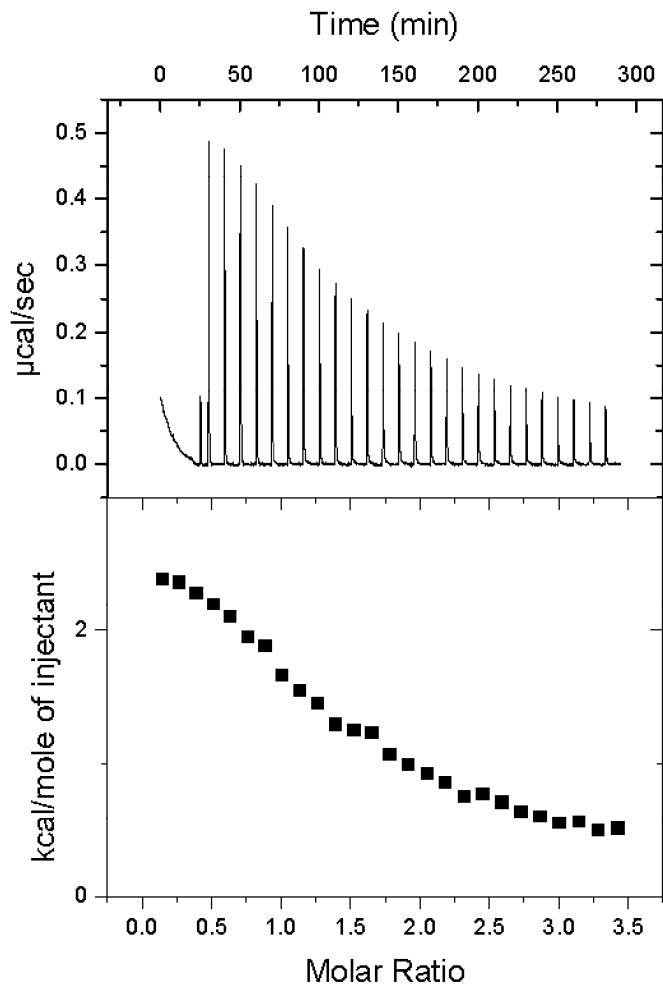

**Figure S5b. Isothermal calorimetric assay of FetP titrated with zinc in ACES-buffer.** A representative titration curve is shown. Top: Baseline-subtracted raw data. Bottom: Peak-integrated and concentration-normalized enthalpy changes vs. Zn(II)/FetP ratios. FetP dimer concentration was used for analysis.

Figure S5c.

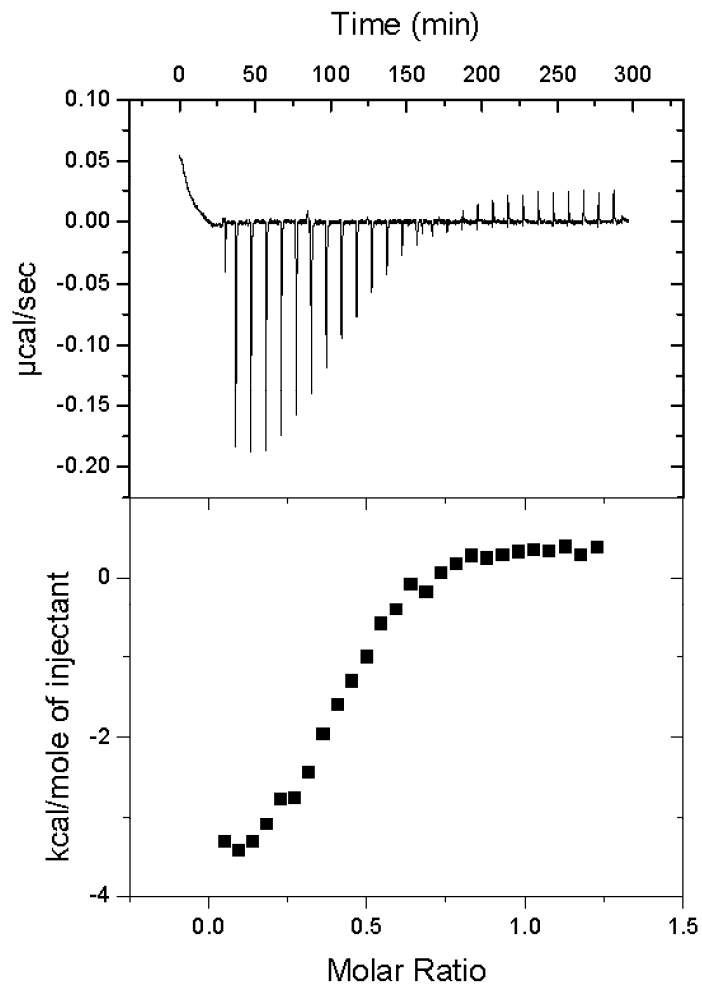

**Figure S5c. Isothermal calorimetric assay of FetP titrated with manganese in Bis-Tris buffer.** A representative titration curve is shown. Top: Baseline-subtracted raw data. Bottom: Peak-integrated and concentration-normalized enthalpy changes vs. Mn(II)/FetP ratios. FetP dimer concentration was used for analysis.



Figure S5d

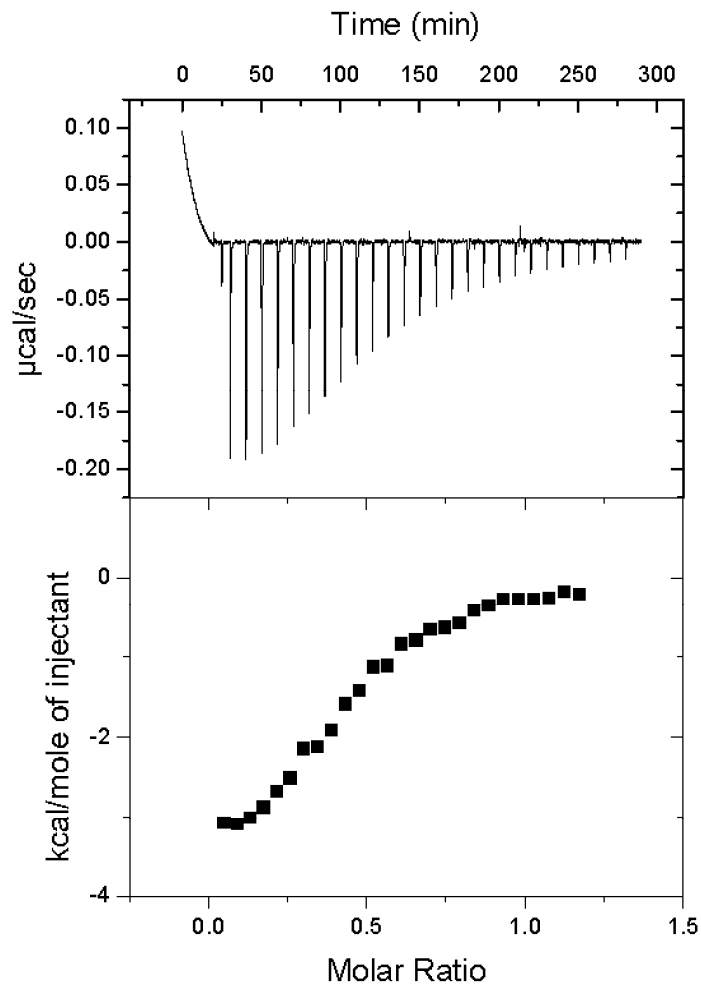

**Figure S5d. Isothermal calorimetric assay of FetP titrated with manganese in ACES buffer.** A representative titration curve is shown. Top: Baseline-subtracted raw data. Bottom: Peak-integrated and concentration-normalized enthalpy changes vs. Mn(II)/FetP ratios. FetP dimer concentration was used for analysis.

Figure S6

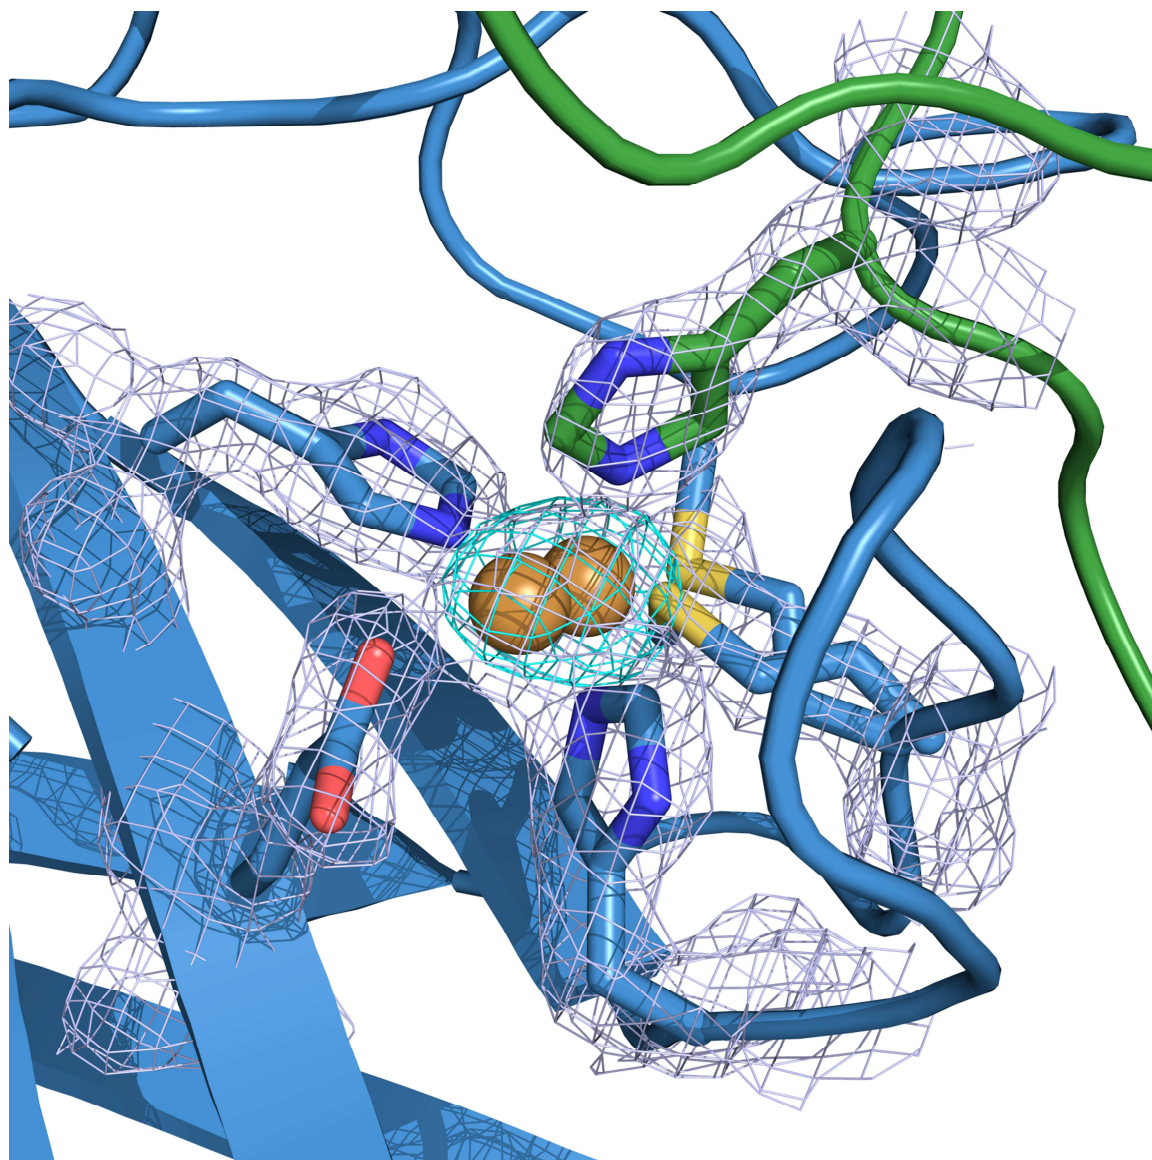

**Figure S6. Electron density at the copper binding site demonstrating multiple copper positions.  $2F_o - F_c$  map in blue contoured at  $1 \sigma$  and copper anomalous map contoured at  $5 \sigma$  in teal.**

Figure S7

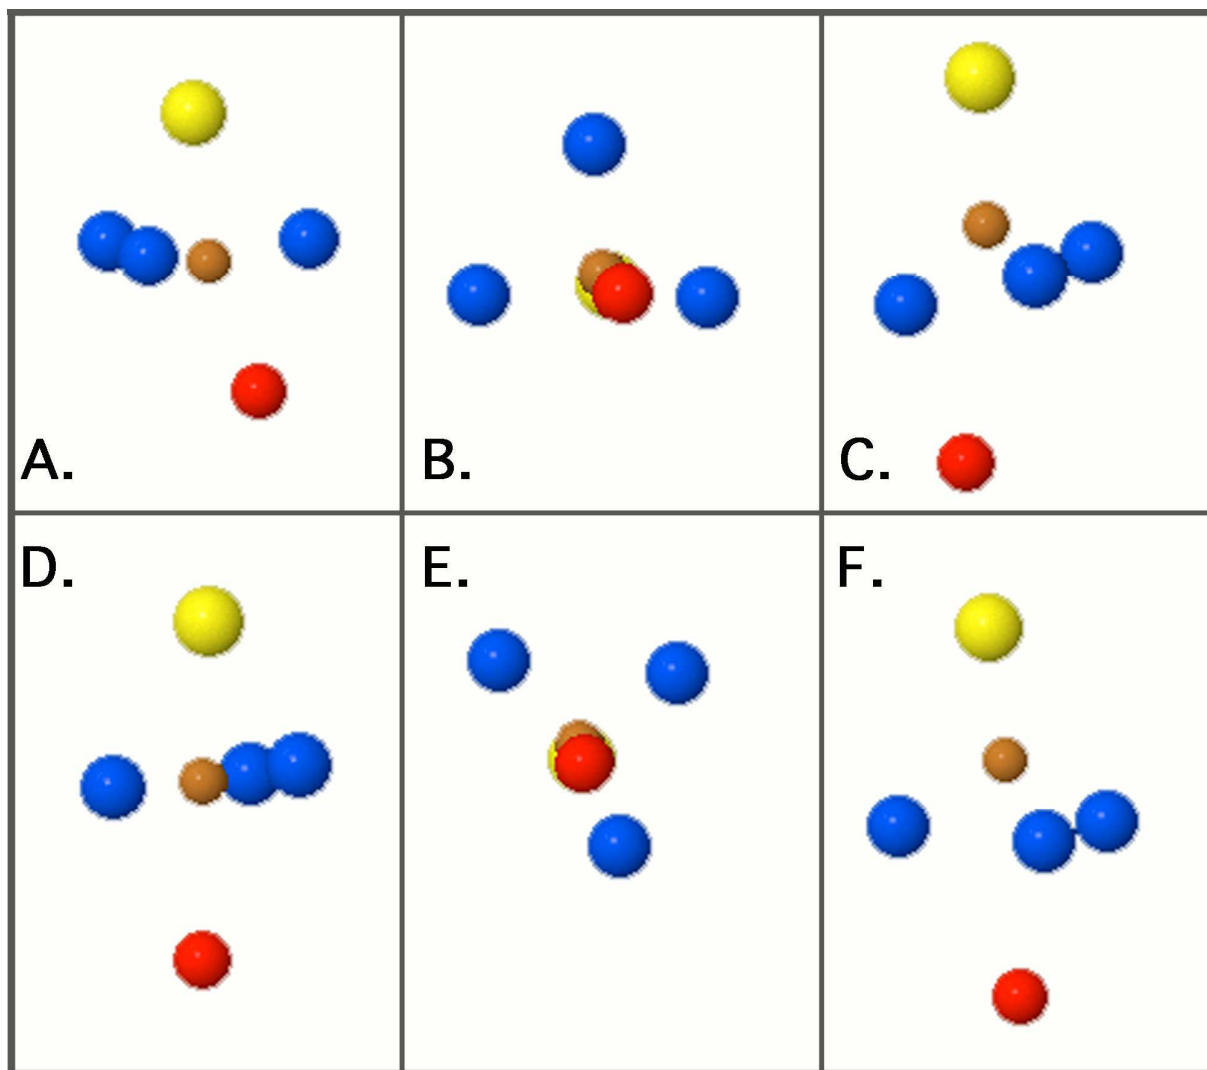

**Figure S7. Arrangement of of the copper atoms in the copper centers.** Panel A shows CuA1 from the side and panel B from the bottom. The O-Cu distance is 2.6 Å and the N-Cu distance is about 1.9 Å. The angle between the N-Cu bonds are close to a right angle. Cu in CuA1 is slightly below the plane defined by the three N atoms. CuA2 is shown in panel C. Panel D shows CuB1 from the side and panel E from the bottom. The O-Cu distance is 3.0 Å and the Cu is located in the plane defined by the N atoms. Again, the N-Cu bonds come close to forming right angles. Panel F shows CuB2. Atoms are shown with different colors: brown (Cu), red (O from Glu), blue (N from His) and yellow (S from Met). The picture was prepared with Geneious 4.8.5 ([www.geneious.com](http://www.geneious.com)).

Figure S8

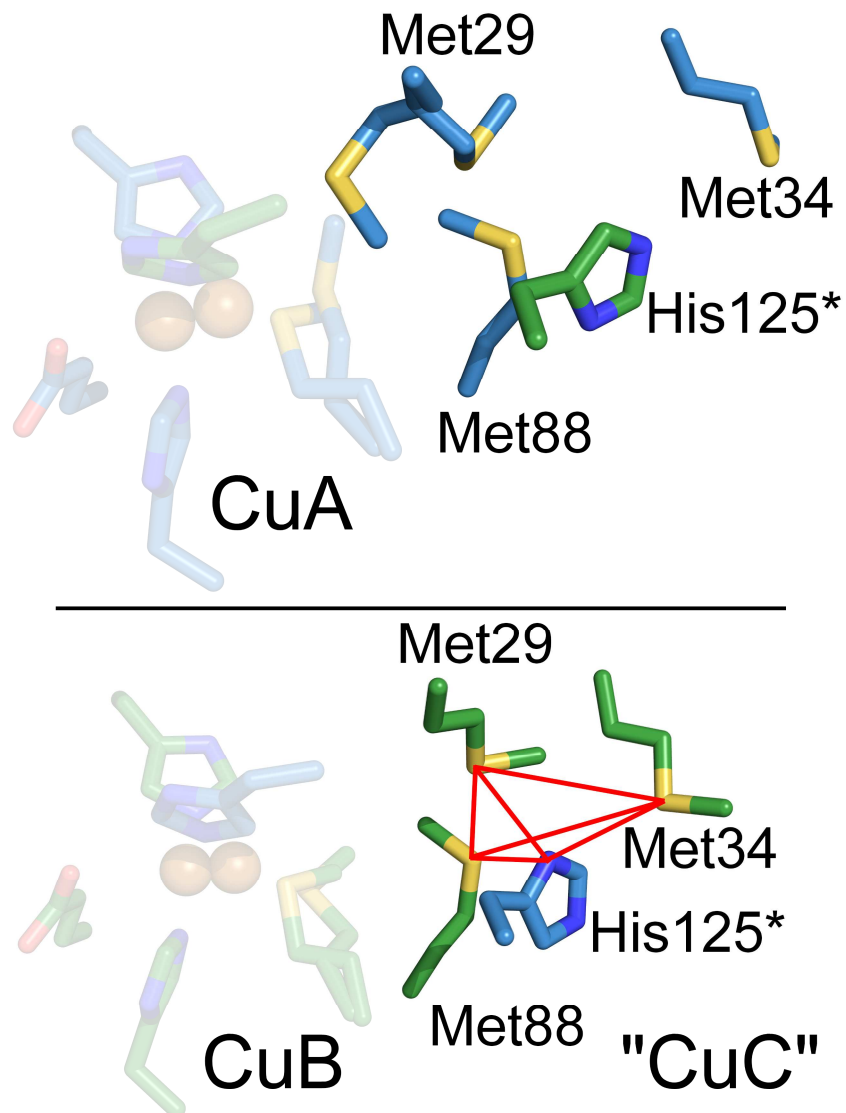

**Figure S8. A putative third metal binding site “CuC” exists adjacent to CuB.** A Met-rich third metal binding site (“CuC”) may exist when the Cu site is in the CuB conformation. “CuC” is indicated by the red tetrahedron and is formed by Met<sub>29</sub>, Met<sub>34</sub>, and Met<sub>88</sub> from the same protomer and His<sub>125</sub>\* from the other protomer. Adjacent to CuA, Met<sub>29</sub>, Met<sub>88</sub> and His<sub>125</sub>\* are also close together but M<sub>34</sub> is far away.

Figure S9

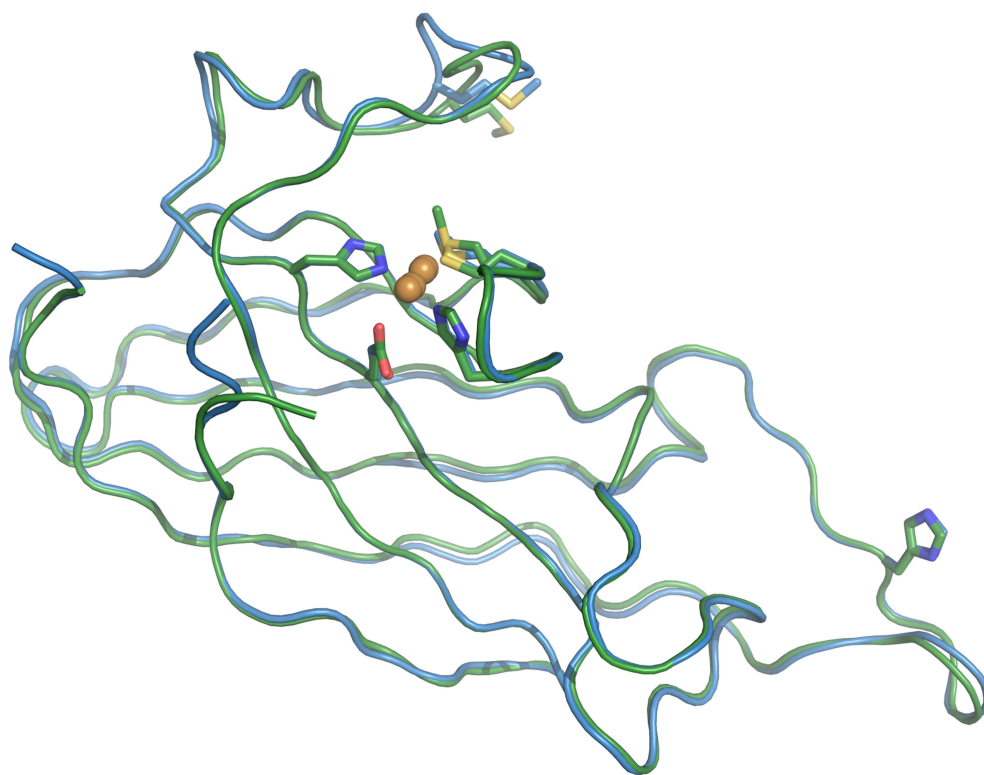

**Figure S9. Superposition of the two Cu-FetP protomers.**
